# Supplementary material for: GLS1 is a Protective Factor in Patients with Ovarian Clear Cell Carcinoma and its Expression Does Not Correlate with ARID1A-mutated Tumors
Source: Oxford University Press journal article supplement (doi:10.1158/2767-9764.crc-22-0122), 2022-07-18
Supplement: crc-22-0122-s01.pdf [file crc-22-0122-s01.pdf]

# Supplementary figure 1

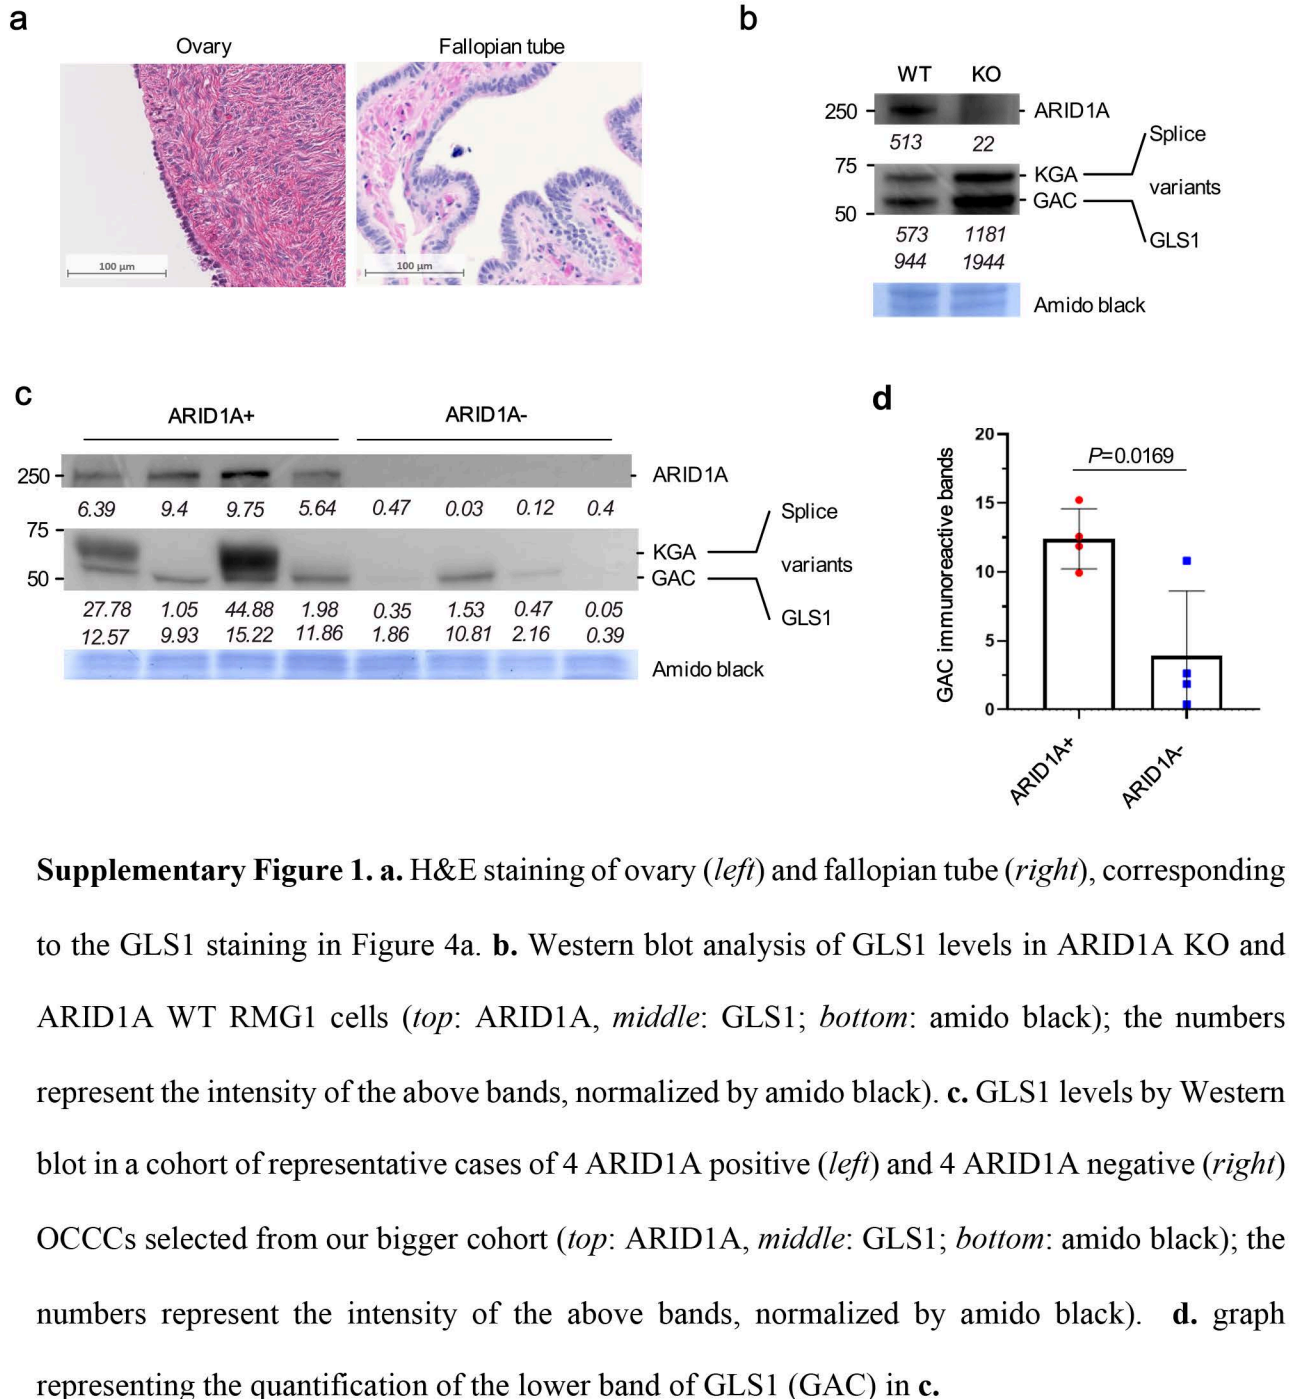

**Supplementary Figure 1. a.** H&E staining of ovary (*left*) and fallopian tube (*right*), corresponding to the GLS1 staining in Figure 4a. **b.** Western blot analysis of GLS1 levels in ARID1A KO and ARID1A WT RMG1 cells (*top*: ARID1A, *middle*: GLS1; *bottom*: amido black); the numbers represent the intensity of the above bands, normalized by amido black). **c.** GLS1 levels by Western blot in a cohort of representative cases of 4 ARID1A positive (*left*) and 4 ARID1A negative (*right*) OCCCs selected from our bigger cohort (*top*: ARID1A, *middle*: GLS1; *bottom*: amido black); the numbers represent the intensity of the above bands, normalized by amido black). **d.** graph representing the quantification of the lower band of GLS1 (GAC) in c.

**Supplementary Table 1 Characteristics of ARID1A+ and ARID1A- patients.** Numeric measures were tested using t-tests and categorical measures using Fisher's exact tests.

|                       | Positive (N=36) | Negative (N=19) | Total (N=55)    | p value |
|-----------------------|-----------------|-----------------|-----------------|---------|
| <b>Age</b>            |                 |                 |                 | 0.792   |
| <i>Mean (SD)</i>      | 59.8 (10.1)     | 60.5 (10.7)     | 60.0 (10.2)     |         |
| <b>BMI</b>            |                 |                 |                 | 0.737   |
| <i>Mean (SD)</i>      | 29.0 (7.4)      | 28.3 (8.3)      | 28.8 (7.6)      |         |
| <b>Endometriosis</b>  |                 |                 |                 | 0.050   |
| <i>Yes</i>            | 14 (38.9%)      | 13 (68.4%)      | 27 (49.1%)      |         |
| <i>No</i>             | 22 (61.1%)      | 6 (31.6%)       | 28 (50.9%)      |         |
| <b>Menopause</b>      |                 |                 |                 | 1.000   |
| <i>N-Miss</i>         | 3               | 1               | 4               |         |
| <i>postmenopausal</i> | 24 (72.7%)      | 13 (72.2%)      | 37 (72.5%)      |         |
| <i>premenopausal</i>  | 9 (27.3%)       | 5 (27.8%)       | 14 (27.5%)      |         |
| <b>Ca125</b>          |                 |                 |                 | 0.161   |
| <i>N-Miss</i>         | 10              | 7               | 17              |         |
| <i>Mean (SD)</i>      | 808.8 (1159.7)  | 1757.4 (2957.1) | 1108.4 (1925.7) |         |
| <b>stage_4c</b>       |                 |                 |                 | 0.067   |
| <i>I</i>              | 15 (41.7%)      | 14 (73.7%)      | 29 (52.7%)      |         |
| <i>II</i>             | 9 (25.0%)       | 1 (5.3%)        | 10 (18.2%)      |         |
| <i>III</i>            | 11 (30.6%)      | 3 (15.8%)       | 14 (25.5%)      |         |
| <i>IV</i>             | 1 (2.8%)        | 1 (5.3%)        | 2 (3.6%)        |         |
| <b>stage_2c</b>       |                 |                 |                 | 0.045   |
| <i>I</i>              | 15 (41.7%)      | 14 (73.7%)      | 29 (52.7%)      |         |
| <i>II/III/IV</i>      | 21 (58.3%)      | 5 (26.3%)       | 26 (47.3%)      |         |
| <b>stage_bin</b>      |                 |                 |                 | 0.533   |
| <i>I/II</i>           | 24 (66.7%)      | 15 (78.9%)      | 39 (70.9%)      |         |
| <i>III/IV</i>         | 12 (33.3%)      | 4 (21.1%)       | 16 (29.1%)      |         |

|                              |            |            |            |       |
|------------------------------|------------|------------|------------|-------|
| <b>Surgical outcome</b>      |            |            |            | 1.000 |
| <i>no residual disease</i>   | 28 (77.8%) | 16 (84.2%) | 44 (80.0%) |       |
| <i>optimal &lt; 1 cm</i>     | 5 (13.9%)  | 2 (10.5%)  | 7 (12.7%)  |       |
| <i>suboptimal &gt;1 cm</i>   | 3 (8.3%)   | 1 (5.3%)   | 4 (7.3%)   |       |
| <b>Chemotherapy response</b> |            |            |            | 0.776 |
| <i>N-Miss</i>                | 4          | 2          | 6          |       |
| <i>complete</i>              | 28 (87.5%) | 14 (82.4%) | 42 (85.7%) |       |
| <i>partial</i>               | 2 (6.2%)   | 2 (11.8%)  | 4 (8.2%)   |       |
| <i>stable</i>                | 1 (3.1%)   | 0 (0.0%)   | 1 (2.0%)   |       |
| <i>progressive</i>           | 1 (3.1%)   | 1 (5.9%)   | 2 (4.1%)   |       |
| <b>Recurrence</b>            |            |            |            | 0.247 |
| <i>Yes</i>                   | 12 (33.3%) | 10 (52.6%) | 22 (40.0%) |       |
| <i>No</i>                    | 24 (66.7%) | 9 (47.4%)  | 33 (60.0%) |       |
| <b>Death by cancer</b>       |            |            |            | 0.047 |
| <i>N-Miss</i>                | 0          | 1          | 1          |       |
| <i>Yes</i>                   | 6 (16.7%)  | 8 (44.4%)  | 14 (25.9%) |       |
| <i>No</i>                    | 30 (83.3%) | 10 (55.6%) | 40 (74.1%) |       |
| <b>Death</b>                 |            |            |            | 0.071 |
| <i>Yes</i>                   | 8 (22.2%)  | 9 (47.4%)  | 17 (30.9%) |       |
| <i>No</i>                    | 28 (77.8%) | 10 (52.6%) | 38 (69.1%) |       |

---

**Supplementary Table 2. Characteristics of patients divided by GLS1 expression levels (low: <100; intermediate: <200. ≥100; high: ≥200).** Numeric measures were tested using ANOVA and categorical measures using Fisher's exact tests.

|                      | < 100 (N=22)         | 100-200 (N=19)        | > 200 (N=13)        | Total (N=54)         | p value |
|----------------------|----------------------|-----------------------|---------------------|----------------------|---------|
| <b>Age</b>           |                      |                       |                     |                      | 0.441   |
| Mean (SD)            | 61.8 (11.8)          | 57.8 (9.0)            | 60.3 (6.3)          | 60.0 (9.7)           |         |
| <b>BMI</b>           |                      |                       |                     |                      | 0.238   |
| Mean (SD)            | 26.7 (8.5)           | 30.4 (7.3)            | 30.3 (6.2)          | 28.9 (7.7)           |         |
| <b>Endometriosis</b> |                      |                       |                     |                      | 0.831   |
| Yes                  | 11 (50.0%)           | 8 (42.1%)             | 7 (53.8%)           | 26 (48.1%)           |         |
| No                   | 11 (50.0%)           | 11 (57.9%)            | 6 (46.2%)           | 28 (51.9%)           |         |
| <b>Menopause</b>     |                      |                       |                     |                      | 0.765   |
| N-Miss               | 0                    | 1                     | 3                   | 4                    |         |
| postmenopausal       | 15 (68.2%)           | 14 (77.8%)            | 8 (80.0%)           | 37 (74.0%)           |         |
| premenopausal        | 7 (31.8%)            | 4 (22.2%)             | 2 (20.0%)           | 13 (26.0%)           |         |
| <b>Ca125.5</b>       |                      |                       |                     |                      | 0.508   |
| N-Miss               | 7                    | 3                     | 6                   | 16                   |         |
| Mean (SD)            | 1060.1 (1124.1)      | 1450.9 (2736.8)       | 421.0 (584.7)       | 1106.9 (1926.4)      |         |
| Median (Range)       | 550.0 (39.0, 3547.0) | 241.4 (34.0, 10671.0) | 194.0 (3.0, 1675.0) | 370.0 (3.0, 10671.0) |         |
| <b>stage_4c</b>      |                      |                       |                     |                      | 0.631   |
| I                    | 12 (54.5%)           | 8 (42.1%)             | 7 (53.8%)           | 27 (50.0%)           |         |
| II                   | 3 (13.6%)            | 6 (31.6%)             | 1 (7.7%)            | 10 (18.5%)           |         |
| III                  | 6 (27.3%)            | 4 (21.1%)             | 5 (38.5%)           | 15 (27.8%)           |         |
| IV                   | 1 (4.5%)             | 1 (5.3%)              | 0 (0.0%)            | 2 (3.7%)             |         |
| <b>stage_2c</b>      |                      |                       |                     |                      | 0.780   |
| I                    | 12 (54.5%)           | 8 (42.1%)             | 7 (53.8%)           | 27 (50.0%)           |         |
| II/III/IV            | 10 (45.5%)           | 11 (57.9%)            | 6 (46.2%)           | 27 (50.0%)           |         |
| <b>stage_bin</b>     |                      |                       |                     |                      | 0.761   |

|                              |            |            |             |            |       |
|------------------------------|------------|------------|-------------|------------|-------|
| I/II                         | 15 (68.2%) | 14 (73.7%) | 8 (61.5%)   | 37 (68.5%) |       |
| III/IV                       | 7 (31.8%)  | 5 (26.3%)  | 5 (38.5%)   | 17 (31.5%) |       |
| <b>result_of_surgery</b>     |            |            |             |            | 0.954 |
| no residual disease          | 18 (81.8%) | 15 (78.9%) | 11 (84.6%)  | 44 (81.5%) |       |
| optimal < 1 cm               | 3 (13.6%)  | 2 (10.5%)  | 1 (7.7%)    | 6 (11.1%)  |       |
| suboptimal >1 cm             | 1 (4.5%)   | 2 (10.5%)  | 1 (7.7%)    | 4 (7.4%)   |       |
| <b>chemotherapy_response</b> |            |            |             |            | 0.399 |
| N-Miss                       | 3          | 2          | 1           | 6          |       |
| complete                     | 16 (84.2%) | 12 (70.6%) | 12 (100.0%) | 40 (83.3%) |       |
| partial                      | 1 (5.3%)   | 3 (17.6%)  | 0 (0.0%)    | 4 (8.3%)   |       |
| stable                       | 1 (5.3%)   | 0 (0.0%)   | 0 (0.0%)    | 1 (2.1%)   |       |
| progressive                  | 1 (5.3%)   | 2 (11.8%)  | 0 (0.0%)    | 3 (6.2%)   |       |
| <b>recurrence_yn</b>         |            |            |             |            | 0.116 |
| Yes                          | 11 (50.0%) | 9 (47.4%)  | 2 (15.4%)   | 22 (40.7%) |       |
| No                           | 11 (50.0%) | 10 (52.6%) | 11 (84.6%)  | 32 (59.3%) |       |
| <b>death_by_cancer_yn</b>    |            |            |             |            | 0.040 |
| N-Miss                       | 1          | 0          | 1           | 2          |       |
| Yes                          | 8 (38.1%)  | 6 (31.6%)  | 0 (0.0%)    | 14 (26.9%) |       |
| No                           | 13 (61.9%) | 13 (68.4%) | 12 (100.0%) | 38 (73.1%) |       |
| <b>death_yn</b>              |            |            |             |            | 0.200 |
| Yes                          | 10 (45.5%) | 6 (31.6%)  | 2 (15.4%)   | 18 (33.3%) |       |
| No                           | 12 (54.5%) | 13 (68.4%) | 11 (84.6%)  | 36 (66.7%) |       |

---
